# Supplementary material
Source: publisher site journal article supplement (https://www.dovepress.com/get_supplementary_file.php?f=356573.docx)
Supplement: Supplementary file 1 [file get_supplementary_file.php]

**Supplementary materials**

**Table S1** The primer sequences for the 10 biomarkers.

Using an SYBR Premix Ex Taq Kit (RR420A; Takara, Tokyo, Japan), q-PCR was performed on an ABI Prism 7500 sequence detection system (PE Applied Biosystems, FosterCity, CA). We have found that following 10 biomarkers are closely related to the occurrence and development of hepatocellular carcinoma. Fold changes of relative gene expression were recorded by 2eDDCt. The PCR protocol consisted of an initial denaturation step at 95 C for 10 min, followed by 40 cycles of denaturation at 95 C for 30 sec, annealing at 55 C for 30 sec and extension at 72 C for 30 sec, and fluorescence acquisition at 72 C. Primers used in this study are as follows:

| Gene | forward | reverse | product length |
| --- | --- | --- | --- |
| *BARD1* | 5'-GCTTCTATTAAGGGCGACAT-3' | 5'-GTTCACCAATGCCTTATGCT-3' | 162 |
| *CKAP5* | 5'-CTCCTGAAAGGCTTGGACAAT-3 | 5'-GCATCCCGAATCCATCTGTAAA-3' | 209 |
| *MAP17* | 5'-CTGCACACATGATCCTGACCG-3' | 5'-CTCACTGGACCTGAAACTGGC-3' | 101 |
| *AKR1B10* | 5'- TCAGAATGAACATGAAGTGGGG-3' | 5'- TCAGAATGAACATGAAGTGGGG-3' | 98 |
| *MDR1* | 5'-TGCTCAGACAGGATGTGAGTTG | 5'-AATTACAGCAAGCCTGGAACC-3' | 121 |
| *ABCC3* | 5'- TGGGGTGAAGTTTCGTACTGG-3' | 5'- CACGTTTGACTGAGTTGGTGATA-3' | 77 |
| *AR* | 5'-CCAGGGACCATGTTTTGCC-3' | 5'-CGAAGACGACAAGATGGACAA-3' | 226 |
| *BCAT1* | 5'- GTGGAGTGGTCCTCAGAGTTT -3' | 5'- AGCCAGGGTGCAATGACAG-3' | 76 |
| *DTGCU2* | 5'- GTTGGAGGAGTGATGCTCAAGTTAG-3' | 5'- ATTTTATGCTGAGGGGTGAAGAGA-3' | 173 |
| *DOCK3* | 5'-CATGGGGAAACATGTCGGAT-3' | 5'-AGGAAAAGAAGACATCGGTA-3' | 103 |
| *β-actin* | 5′-GACAGGATGCAGAAGGAGATTACT-3′ | 5′-TGATCCACATCTGCTGGAAGGT-3′ | 142 |

| **Table S2** Selected features in CECT and thei r[coefficient](javascript:;) | |  |
| --- | --- | --- |
| **Characteristic** | **Coef** | |
| Intercept | -0.298612478499375 | |
| AP-original_shape_Maximum2DDiameterColumn | 0.0638543226367318 | |
| AP-original_shape_Sphericity | -0.23481662735511 | |
| AP-original_glrlm_RunLengthNonUniformity | 0.274112936618498 | |
| AP-wavelet_LLH_firstorder_Kurtosis | 0.0204664757912379 | |
| AP-wavelet_LLH_gldm_SmallDependenceLowGrayLevelEmphasis | -0.0301819830358242 | |
| AP-wavelet_LLL_glrlm_RunLengthNonUniformity | 7.52949364349176e-05 | |
| VP-log-sigma-4-0-mm-3D_ngtdm_Contrast | 0.0689162129523408 | |
| VP-wavelet-LLH_glcm_ClusterProminence | 0.0939544120876489 | |
| VP-wavelet-LLH_glszm_SmallAreaEmphasis | 0.0410694150881779 | |
| VP-wavelet-HLL_firstorder_Skewness | -0.0754455658373633 | |
| VP-wavelet-HHH_glszm_GrayLevelNonUniformityNormalized | 0.165783090874581 | |
| AP：arterial phase; VP：venous phase |  | |
|  |  | |

**Radiomics score calculation formula:**

Radiomics score = -0.298612478499375 +

0.0638543226367318 × AP-original_shape_Maximum2DDiameterColumn

- 0.23481662735511 × AP-original_shape_Sphericity

+ 0.274112936618498 × AP-original_glrlm_RunLengthNon-Uniformity

+ 0.0204664757912379 × AP-wavelet_LLH_firstorder_Kurtosis

+ 0.00226861481888181 × AP-wavelet-LHL-firstorder_Kurtosis

- 0.0301819830358242 × AP-wavelet_LLH_gldm_SmallDependenceLowGrayLevelEmphasis

+ 7.52949364349176e-05 × AP-wavelet_LLL_glrlm_RunLengthNon-Uniformity

+ 0.0689162129523408 × VP-log-sigma-4-0-mm-3D_ngtdm_Contrast

+ 0.0939544120876489 × VP-wavelet-LLH_glcm_ClusterProminence

+ 0.0410694150881779 × VP-wavelet-LLH_glszm_SmallAreaEmphasis

- 0.0754455658373633 × VP-wavelet-HLL_firstorder_Skewness

+ 0.165783090874581 × VP-wavelet-HHH_glszm_GrayLevelNon-UniformityNormalized

**
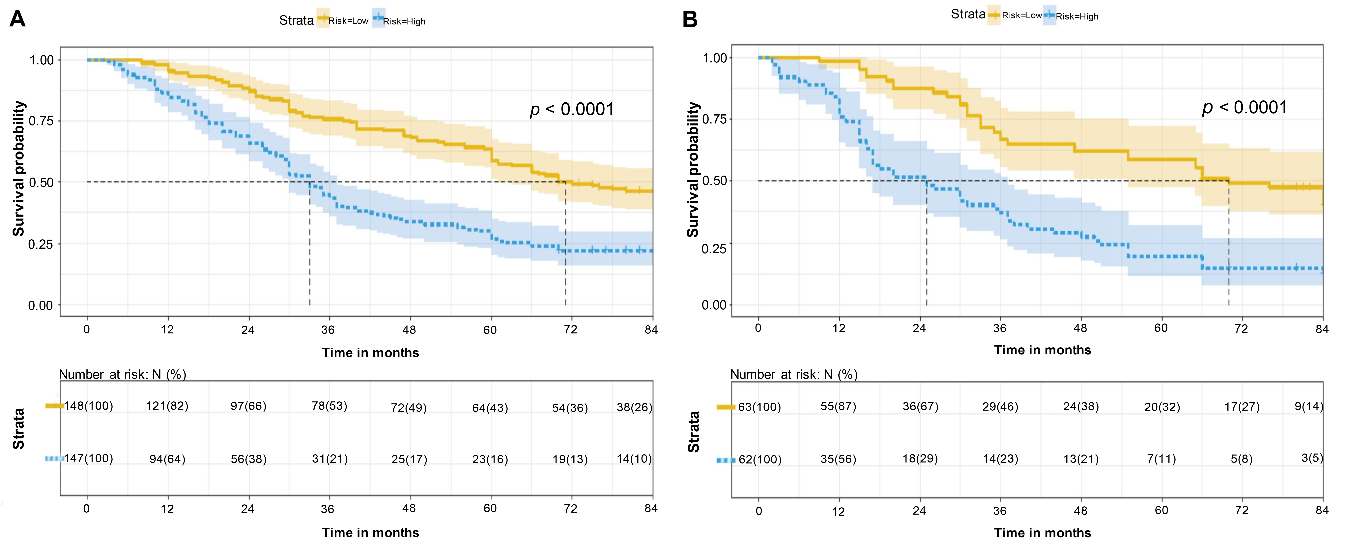
**

**Figure S1.** Survival curves according to nomogram. The Kaplan-Meier curves depict overall survival in HCC patients according to the classification of nomogram in the (A) training and (B) validation cohorts.
